# Supplementary material for: Dominant associations of Ensifer medicae-Medicage polymorpha and Ensifer meliloti-Medicago lupulina in farmland and natural ecosystem
Source: Research Square preprint supplement (doi:10.21203/rs.3.rs-615146/v1), 2021-06-17
Supplement: Supplementary file 1 [file 677dd43c6dcc328e913ba7a7.xlsx]

## Sheet: Sheet1
Table S2. Detailed information of soil samples
ID	Latitude (oN)	Longitude (oE)	Altitude (m)	No. rhizobial isolations	genotypes	Detailed address [in Chinese]	Habitat	Host Plant	County	OM （g/kg）	Nit （mg/kg）	Pho （mg/kg）	Pot （mg/kg）	pH	Na+ （mg/kg）	Ca2+ （mg/kg）	Mg2+ （mg/kg）	HCO3- （mg/kg）	Cl- （mg/kg）	SO42- （mg/kg）
Kx	N 25°21ʹ37ʺ	E 102°58ʹ48ʺ	1930	4	S.medicae genotype Ⅰ	昆明大板桥镇小哨	Farmland	M.polymorpha	Dabanqiao	32.83	124.78	17.75	210.8	5.5	54.58	67.42	24.09	46.48	40.43	30.24
Lj1	N 25°10ʹ35.91ʺ	E 102°06ʹ14.80ʺ	1570	6	S.medicae genotype Ⅰ	禄丰县金山镇东侧小河旁田地	Farmland	M.polymorpha	Jinshang	12.09	45.08	5.17	93.26	7.20333	24.71	55.25	30.41	37.04	30.77	22.56
Lj2	N 25°09ʹ50.94ʺ	E 102°03ʹ38.28ʺ	1571	5	S.medicae genotype Ⅰ	禄丰县金山镇东侧小河边田地	Farmland	M.polymorpha	Jinshang	22.67	75.67	9.15	192.76	7.30333	46.05	47.71	30.92	37.04	40.21	14.4
Lj3	N 25°09ʹ11.99ʺ	E 102°06ʹ12.33ʺ	1575	5	S.medicae genotype Ⅰ	禄丰县金山镇东侧河边田地	Farmland	M.polymorpha	Jinshang	16.41	59.57	8.33	158.15	7.31	54.58	65.23	33.99	43.58	30.77	25.92
Lj4	N 25°10ʹ40.41ʺ	E 102°05ʹ5.62ʺ	1565	3	S.medicae genotype Ⅰ	禄丰县金山镇路边小河旁	Farmland	M.polymorpha	Jinshang	13.11	38.64	8.05	184.11	7.29333	135.64	66.94	40.98	38.01	50.1	22.08
Lll	N 25°02ʹ12.36ʺ	E 102°09ʹ24.63ʺ	1600	3	S.medicae genotype Ⅰ	禄丰县腰站炼象关关外200m菜地中	Farmland	M.polymorpha	Yaozhan	24.23	94.99	18.2	58.65	7.53667	41.78	69.37	37.06	38.25	30.55	14.88
Ll2	N 25°01ʹ57.92ʺ	E 102°08ʹ9.31ʺ	1635	2	S.medicae genotype Ⅰ	禄丰县腰站炼象关关外200m田埂	Farmland	M.polymorpha	Yaozhan	40.18	143.29	6.5	205.45	7.52667	24.71	94.69	41.84	38.25	40.87	37.44
Ll3	N 25°00ʹ57.33ʺ	E 102°07ʹ36.48ʺ	1600	1	S.medicae genotype Ⅰ	禄丰县腰站炼象关关外稻田500m	Farmland	M.polymorpha	Yaozhan	42.9	161	3.66	123.54	7.49	46.05	131.2	51.39	44.55	60.43	69.12
Ll4	N 25°01ʹ9.83ʺ	E 102°09ʹ24.11ʺ	1620	2	S.medicae genotype Ⅰ	禄丰县腰站炼象关关外梯田间坡上	Farmland	M.polymorpha	Yaozhan	20.27	88.55	2.98	41.35	7.64667	7.65	59.64	38.08	34.86	30.77	13.92
Ll5	N 25°01ʹ52.74ʺ	E 102°05ʹ49.89ʺ	1610	3	S.medicae genotype Ⅰ	禄丰县腰站烁象关水渠旁路边	Farmland	M.polymorpha	Yaozhan	8.23	19.32	4.62	71.63	7.5	80.18	83	33.99	46.48	80.42	17.28
Ly1	N 25°02ʹ24.17ʺ	E 102°07ʹ16.58ʺ	1642	3	S.medicae genotype Ⅰ	禄丰县腰站乡杨家庄村外稻田间	Farmland	M.polymorpha	Yaozhan	10.21	24.15	6.82	110.57	7.67333	71.65	91.52	29.72	52.53	40.87	23.04
Ly2	N 25°03ʹ37.47ʺ	E 102°11ʹ22.87ʺ	1640	5	S.medicae genotype Ⅰ	禄丰县腰站乡杨家庄村外路北稻田坡上	Farmland	M.polymorpha	Yaozhan	10.21	20.93	4.21	149.5	7.57667	37.51	100.53	32.79	43.58	50.32	53.76
Ly3	N 25°02ʹ16.86ʺ	E 102°11ʹ35.29ʺ	1600	4	S.medicae genotype Ⅰ	禄丰县腰站乡杨家庄村外路北坡上玉米地	Farmland	M.polymorpha	Yaozhan	74.99	84.22	13	129.49	7.37	16.18	63.53	26.65	38.25	30.55	18.24
Ly4	N 25°03ʹ34.17ʺ	E 102°08ʹ56.44ʺ	1630	2	S.medicae genotype Ⅰ	禄丰县腰站乡杨家庄村外路北稻田埂上	Farmland	M.polymorpha	Yaozhan	70.3	227.7	8.7	175.91	7.64	20.45	76.43	29.21	47.45	30.77	13.44
Ly5	N 25°01ʹ58.00ʺ	E 101°13ʹ16.18ʺ	1611	2	S.medicae genotype Ⅰ	禄丰县腰站乡杨家庄村外路边稻田里	Farmland	M.polymorpha	Yaozhan	10.55	20.93	12.3	149.5	7.39333	75.91	127.79	39.11	43.58	80.64	35.52
Cd1	N 25°04ʹ5.31ʺ	E 101°40ʹ5.87ʺ	1867	1	S.medicae genotype Ⅰ	楚雄市苍岭镇戴家屯稻田公路旁小寨山	Farmland	M.polymorpha	Cangling	66.29	120.87	30	37.02	7.12	7.65	80.33	17.78	43.09	30.99	24.48
Cd2	N 25°03ʹ1.21ʺ	E 101°39ʹ39.48ʺ	1850	1	S.medicae genotype Ⅰ	楚雄市苍岭镇戴家屯公路边小寨山	Farmland	M.polymorpha	Cangling	63.41	115.41	5.17	58.65	7.55333	58.85	65.72	31.43	52.29	30.55	24.48
Cd3	N 25°03ʹ41.75ʺ	E 101°45ʹ43.75ʺ	1832	1	S.medicae genotype Ⅰ	楚雄市苍岭镇戴家屯田埂边小寨山	Farmland	M.polymorpha	Cangling	49.14	198.03	25	28.37	7.83	20.45	85.19	28.19	31.96	30.77	26.88
Cb1	N 25°03ʹ52.59ʺ	E 101°39ʹ46.73ʺ	1890	1	S.medicae genotype Ⅰ	楚雄市苍岭镇饱满街西边地里	Farmland	M.polymorpha	Cangling	54.95	178.71	9.15	257.65	7.24667	24.71	63.53	25.46	44.55	40.21	25.44
Cb2	N 25°05ʹ33.91ʺ	E 101°40ʹ36.40ʺ	1880	1	S.medicae genotype Ⅰ	楚雄市苍岭镇饱满街西侧田梗	Farmland	M.polymorpha	Cangling	8.31	19.32	2.29	71.63	7.85	50.31	113.67	46.78	9.68	40.21	27.84
Cb3	N 25°05ʹ51.82ʺ	E 101°36ʹ21.83ʺ	1878	1	S.medicae genotype Ⅰ	楚雄市苍岭镇饱满街东边田野	Farmland	M.polymorpha	Cangling	9.62	17.71	2.29	50	7.65	84.45	55.98	35.01	32.68	80.42	36.96
Cb4	N 25°02ʹ43.19ʺ	E 101°38ʹ2.73ʺ	1869	2	S.medicae genotype Ⅰ	楚雄市苍岭镇饱满街美华酒店后菜地	Farmland	M.polymorpha	Cangling	32.4	103.04	36.31	162.48	7.56333	67.38	97.61	46.61	39.22	30.99	47.04
Cd4	N 24°59ʹ31.87ʺ	E 101°38ʹ34.29ʺ	1821	1	S.medicae genotype Ⅰ	楚雄市苍岭镇戴家屯田埂边小寨山	Natural ecosystem	M.polymorpha	Cangling	5.96	19.32	1.74	80.28	7.45	7.65	23.85	15.39	14.53	30.55	17.28
Cb5	N 24°05ʹ12.72ʺ	E 101°42ʹ11.61ʺ	1830	2	S.medicae genotype Ⅰ	楚雄市苍岭镇饱满街村落	Farmland	M.luplina	Cangling	40.35	77.98	8.1	150.59	7.82667	37.51	51.85	16.41	41.88	40.21	20.16
Kj1	N 24°26ʹ29.29ʺ	E 102°50ʹ36.77ʺ	1749	2	S.medicae genotype Ⅰ	昆明市江川县江川镇1	Natural ecosystem	M.luplina	Jiangchuan	21.81	77.28	17.38	136.52	7.28333	3.2	46.46	29.81	11.79	40.43	10.56
Cd5	N 24°58ʹ45.65ʺ	E 101°43ʹ38.54ʺ	1832	1	S.medicae genotype Ⅱ	楚雄市苍岭镇戴家屯田埂边小寨山	Natural ecosystem	M.polymorpha	Cangling	27.81	72.45	8.19	210.06	7.28	24.71	60.37	20.68	38.74	30.99	14.4
Yp1	N 24°47ʹ12ʺ	E 97°51ʹ14ʺ	880	6	S. meliloti rgenotype Ⅰ	德宏州盈江县平原镇1	Farmland	M.polymorpha	Yingjiang	57	132.1	37.75	91	5.62	3.6	5.65	22.39	33.17	30.55	29.76
Ky1	N 24°52ʹ41.61ʺ	E 103°08ʹ5.69ʺ	1547	1	S. meliloti genotype Ⅰ	昆明市宜良县西毛营西北	Natural ecosystem	M.luplina	Yiliang	46.75	189.98	23	210.06	7.54333	4.35	5.19	25.4	32.26	30.32	6.72
Kj 2	N 24°22ʹ7.72ʺ	E 102°44ʹ11.81ʺ	1752	3	S. meliloti rgenotype Ⅰ	昆明市江川县江川镇2	Natural ecosystem	M.luplina	Jiangchuan	30.14	112.7	10.11	136.52	7.34667	3.1	59.07	29.16	30.71	40.43	20.16
Kj 1	N 24°26ʹ29.29ʺ	E 102°50ʹ36.77ʺ	1749	1	S. meliloti genotype Ⅰ	昆明市江川县江川镇1	Natural ecosystem	M.luplina	Yiliang	21.81	77.28	17.38	136.52	7.28333	3.2	46.46	29.81	11.79	40.43	10.56
Cb6	N 24°07ʹ58.55ʺ	E 101°38ʹ30.15ʺ	1867	1	S. meliloti genotype Ⅰ	楚雄市苍岭镇饱满街湖边	Natural ecosystem	M.luplina	Cangling of Chuxiong	36.87	46.79	6.3	136.52	7.58333	33.25	57.69	22.22	46.48	30.99	24
Cb7	N 24°07ʹ11.91ʺ	E 101°34ʹ32.13ʺ	1899	2	S. meliloti genotype Ⅰ	楚雄市苍岭镇饱满街村	Natural ecosystem	M.luplina	Cangling of Chuxiong	10.52	46.69	10.8	158.15	7.81667	7.65	27.99	17.27	44.55	30.55	10.56
Lj5	N 25°11ʹ10.54ʺ	E 101°57ʹ47.88ʺ	1570	2	S. meliloti genotype Ⅰ	禄丰县金山镇侏罗纪街村	Natural ecosystem	M.luplina	Jinshan of Lufeng	14.11	46.69	7.6	210.06	7.69333	75.91	138.99	40.3	31.23	80.86	68.16
Ky2	N 24°47ʹ19.26ʺ	E 103°08ʹ25.43ʺ	1550	2	S. meliloti genotype Ⅰ	昆明市宜良县西毛营南	Natural ecosystem	M.luplina	Yiliang	27.2	99.82	15	210.6	7.29333	22.77	122.42	38.3	25.44	30.32	26.88
Lj6	N 25°06ʹ54.33ʺ	E 102°01ʹ44.86ʺ	1572	2	S. meliloti genotype Ⅰ	禄丰县金山镇河对岸村落	Natural ecosystem	M.luplina	Jinshan of Lufeng	5.04	30.59	5.17	132.2	7.25667	80.18	34.81	34.16	44.06	30.32	28.8
Ky3	N 24°53ʹ15.59ʺ	E 103°08ʹ4.39ʺ	1569	1	S. meliloti genotype Ⅰ	昆明市宜良南羊西毛营西北1	Farmland	M.luplina	Yiliang	37.19	119.31	16.28	153.83	7.50333	8.04	53.34	34.06	47.46	30.32	13.44
Ky4	N 24°53ʹ53.58ʺ	E 103°09ʹ16.06ʺ	1570	1	S. meliloti genotype Ⅰ	昆明市宜良南羊西毛营西北2	Farmland	M.luplina	Yiliang	56.18	170	15.32	145.17	7.39333	4.35	13.18	28.18	33.19	30.32	12.48
Yp2	N 24°42ʹ40.62ʺ	E 97°55ʹ57.28ʺ	800	2	S. meliloti genotype Ⅰ	德宏州盈江县平原镇2	Farmland	M.polymorpha	Yijiang	52	148.53	32.7	120.5	5.51	3.5	6.66	31.77	36.56	23.32	25.32
Yp3	N 24°41ʹ28.77ʺ	E 97°55ʹ8.14ʺ	900	2	S. meliloti genotype Ⅱ	德宏州盈江县平原镇3	Natural ecosystem	M.polymorpha	Yijiang	11.33	79.7	34.01	119.19	5.51	3.2	5.3	21.5	13.2	21.32	32.1
Ky5	N 24°54ʹ53.52ʺ	E 103°11ʹ46.89ʺ	1550	1	S. meliloti genotype Ⅲ	昆明市宜良县西毛营西北	Natural ecosystem	M.luplina	Yiliang	27.23	93.38	5.72	184.11	7.11667	33.83	38.44	37.65	32.26	40.43	15.84

## Sheet: Sheet2
1	4	S.medicae genotype Ⅰ	昆明大板桥镇小哨	Farmland		1		4	昆明
1	6	S.medicae genotype Ⅰ	禄丰县金山镇东侧小河旁田地	Farmland		1		19	金山
1	5	S.medicae genotype Ⅰ	禄丰县金山镇东侧小河边田地	Farmland		1		27	腰站
1	5	S.medicae genotype Ⅰ	禄丰县金山镇东侧河边田地	Farmland		1			苍岭
1	3	S.medicae genotype Ⅰ	禄丰县金山镇路边小河旁	Farmland		1
1	3	S.medicae genotype Ⅰ	禄丰县腰站炼象关关外200m菜地中	Farmland		1
1	2	S.medicae genotype Ⅰ	禄丰县腰站炼象关关外200m田埂	Farmland		1
1	1	S.medicae genotype Ⅰ	禄丰县腰站炼象关关外稻田500m	Farmland		1
1	2	S.medicae genotype Ⅰ	禄丰县腰站炼象关关外梯田间坡上	Farmland		1
1	3	S.medicae genotype Ⅰ	禄丰县腰站烁象关水渠旁路边	Farmland		1
1	3	S.medicae genotype Ⅰ	禄丰县腰站乡杨家庄村外稻田间	Farmland		1
1	5	S.medicae genotype Ⅰ	禄丰县腰站乡杨家庄村外路北稻田坡上	Farmland		1
1	4	S.medicae genotype Ⅰ	禄丰县腰站乡杨家庄村外路北坡上玉米地	Farmland		1
1	2	S.medicae genotype Ⅰ	禄丰县腰站乡杨家庄村外路北稻田埂上	Farmland		1
1	2	S.medicae genotype Ⅰ	禄丰县腰站乡杨家庄村外路边稻田里	Farmland		1
1	1	S.medicae genotype Ⅰ	楚雄市苍岭镇戴家屯稻田公路旁小寨山	Farmland		1
1	1	S.medicae genotype Ⅰ	楚雄市苍岭镇戴家屯公路边小寨山	Farmland		1
1	1	S.medicae genotype Ⅰ	楚雄市苍岭镇戴家屯田埂边小寨山	Farmland		1
1	1	S.medicae genotype Ⅰ	楚雄市苍岭镇饱满街西边地里	Farmland		1
1	1	S.medicae genotype Ⅰ	楚雄市苍岭镇饱满街西侧田梗	Farmland		1
1	1	S.medicae genotype Ⅰ	楚雄市苍岭镇饱满街东边田野	Farmland		1
1	2	S.medicae genotype Ⅰ	楚雄市苍岭镇饱满街美华酒店后菜地	Farmland		1	nature
1	2	S.medicae genotype Ⅰ	楚雄市苍岭镇饱满街村落	Farmland	medicae	1	3
2	1	S.medicae genotype Ⅰ	楚雄市苍岭镇戴家屯田埂边小寨山	Natural ecosystem		2
2	2	S.medicae genotype Ⅰ	昆明市江川县江川镇1	Natural ecosystem		2
2	0					2
3	2	S. meliloti rDNA type Ⅰ	德宏州盈江县平原镇2	Farmland	meliloti	3	18
3	6	S. meliloti rDNA type Ⅰ	德宏州盈江县平原镇1	Farmland		3
3	1	S. meliloti rDNA type Ⅰ	昆明市宜良南羊西毛营西北1	Farmland		3
3	1	S. meliloti rDNA type Ⅰ	昆明市宜良南羊西毛营西北2	Farmland		3
4	1	S. meliloti rDNA type Ⅰ	昆明市宜良县西毛营西北	Natural ecosystem		4
4	3	S. meliloti rDNA type Ⅰ	昆明市江川县江川镇2	Natural ecosystem		4
4	1	S. meliloti rDNA type Ⅰ	昆明市江川县江川镇1	Natural ecosystem		4
4	1	S. meliloti rDNA type Ⅰ	楚雄市苍岭镇饱满街湖边	Natural ecosystem		4
4	2	S. meliloti rDNA type Ⅰ	楚雄市苍岭镇饱满街村	Natural ecosystem		4
4	2	S. meliloti rDNA type Ⅰ	禄丰县金山镇侏罗纪街村	Natural ecosystem		4
4	2	S. meliloti rDNA type Ⅰ	昆明市宜良县西毛营南	Natural ecosystem		4
4	2	S. meliloti rDNA type Ⅰ	禄丰县金山镇河对岸村落	Natural ecosystem		4
4	2	S. meliloti rDNA type Ⅱ	德宏州盈江县平原镇3	Natural ecosystem		4
4	1	S. meliloti rDNA type Ⅲ	昆明市宜良县西毛营西北	Natural ecosystem		4
4	1	S.medicae genotype Ⅱ	楚雄市苍岭镇戴家屯田埂边小寨山	Natural ecosystem		4
	91

## Sheet: Sheet3
Kx	1	Farmland	M.polymorpha	32.83	124.78	17.75	510.8	5.5	27.85	54.58	67.42	24.09	46.48	40.43	30.24
Lj1	1	Farmland	M.polymorpha	12.09	45.08	5.17	93.26	7.20333	19	24.71	55.25	30.41	37.04	30.77	22.56
Lj2	1	Farmland	M.polymorpha	22.67	75.67	9.15	192.76	7.30333	129.62	46.05	47.71	30.92	37.04	40.21	14.4
Lj3	1	Farmland	M.polymorpha	16.41	59.57	8.33	158.15	7.31	107.5	54.58	65.23	33.99	43.58	30.77	25.92
Lj4	1	Farmland	M.polymorpha	13.11	38.64	8.05	184.11	7.29333	526.41	135.64	66.94	40.98	38.01	50.1	22.08
Lll	1	Farmland	M.polymorpha	24.23	94.99	18.2	58.65	7.53667	61.03	41.78	69.37	37.06	38.25	30.55	14.88
Ll2	1	Farmland	M.polymorpha	40.18	143.29	63.33	569.12	7.52667	63.25	24.71	94.69	41.84	38.25	40.87	37.44
Ll3	1	Farmland	M.polymorpha	42.9	161	3.66	123.54	7.49	23.42	46.05	131.2	51.39	44.55	60.43	69.12
Ll4	1	Farmland	M.polymorpha	20.27	88.55	2.98	41.35	7.64667	47.76	7.65	59.64	38.08	34.86	30.77	13.92
Ll5	1	Farmland	M.polymorpha	8.23	19.32	4.62	71.63	7.5	167.23	80.18	83	33.99	46.48	80.42	17.28
Ly1	1	Farmland	M.polymorpha	10.21	24.15	6.82	110.57	7.67333	30.06	71.65	91.52	29.72	52.53	40.87	23.04
Ly2	1	Farmland	M.polymorpha	10.21	20.93	4.21	149.5	7.57667	16.78	37.51	100.53	32.79	43.58	50.32	53.76
Ly3	1	Farmland	M.polymorpha	74.99	267.26	53.86	664.29	7.37	14.57	16.18	63.53	26.65	38.25	30.55	18.24
Ly4	1	Farmland	M.polymorpha	70.3	262.43	196.92	387.43	7.64	23.42	20.45	76.43	29.21	47.45	30.77	13.44
Ly5	1	Farmland	M.polymorpha	10.55	20.93	12.3	149.5	7.39333	38.91	75.91	127.79	39.11	43.58	80.64	35.52
Cd1	1	Farmland	M.polymorpha	66.29	228.62	52.49	37.02	7.12	7.93	7.65	80.33	17.78	43.09	30.99	24.48
Cd2	1	Farmland	M.polymorpha	63.41	278.53	5.17	58.65	7.55333	129.62	58.85	65.72	31.43	52.29	30.55	24.48
Cd3	1	Farmland	M.polymorpha	49.14	198.03	44.54	28.37	7.83	10.15	20.45	85.19	28.19	31.96	30.77	26.88
Cb1	1	Farmland	M.polymorpha	54.95	178.71	9.15	257.65	7.24667	10.15	24.71	63.53	25.46	44.55	40.21	25.44
Cb2	1	Farmland	M.polymorpha	8.31	19.32	2.29	71.63	7.85	100.86	50.31	113.67	46.78	9.68	40.21	27.84
Cb3	1	Farmland	M.polymorpha	9.62	17.71	2.29	50	7.65	327.29	84.45	55.98	35.01	32.68	80.42	36.96
Cb4	1	Farmland	M.polymorpha	32.4	103.04	36.31	162.48	7.56333	105.28	67.38	97.61	46.61	39.22	30.99	47.04
Cd4	1	Natural ecosystem	M.polymorpha	5.96	19.32	1.74	80.28	7.45	3.51	7.65	23.85	15.39	14.53	30.55	17.28
Cb5	1	Farmland	M.luplina	40.35	132.02	97.76	326.87	7.82667	10.15	37.51	51.85	16.41	41.88	40.21	20.16
Kj1	1	Natural ecosystem	M.luplina	21.81	77.28	17.38	136.52	7.28333	11.65	3.2	46.46	29.81	11.79	40.43	10.56
Cd5	1	Natural ecosystem	M.polymorpha	27.81	72.45	8.19	210.06	7.28	5.72	24.71	60.37	20.68	38.74	30.99	14.4
Yp1	2	Farmland	M.polymorpha	57	132.1	37.75	91	5.62	12.36	3.6	5.65	22.39	33.17	30.55	29.76
Ky1	2	Natural ecosystem	M.luplina	46.75	189.98	23	210.06	7.54333	35.6	4.35	5.19	25.4	32.26	30.32	6.72
Kj 2	2	Natural ecosystem	M.luplina	30.14	112.7	10.11	136.52	7.34667	17.64	3.1	59.07	29.16	30.71	40.43	20.16
Kj 1	2	Natural ecosystem	M.luplina	21.81	77.28	17.38	136.52	7.28333	11.65	3.2	46.46	29.81	11.79	40.43	10.56
Cb6	2	Natural ecosystem	M.luplina	36.87	133.63	50.98	136.52	7.58333	34.48	33.25	57.69	22.22	46.48	30.99	24
Cb7	2	Natural ecosystem	M.luplina	10.52	46.69	10.8	158.15	7.81667	43.33	7.65	27.99	17.27	44.55	30.55	10.56
Lj5	2	Natural ecosystem	M.luplina	14.11	46.69	7.6	210.06	7.69333	41.12	75.91	138.99	40.3	31.23	80.86	68.16
Ky2	2	Natural ecosystem	M.luplina	27.2	99.82	79.1	210.6	7.29333	37.1	22.77	122.42	38.3	25.44	30.32	26.88
Lj6	2	Natural ecosystem	M.luplina	5.04	30.59	5.17	132.2	7.25667	83.16	80.18	34.81	34.16	44.06	30.32	28.8
Ky3	2	Farmland	M.luplina	37.19	144.9	16.28	153.83	7.50333	23.63	8.04	53.34	34.06	47.46	30.32	13.44
Ky4	2	Farmland	M.luplina	56.18	209.3	15.32	145.17	7.39333	14.64	4.35	13.18	28.18	33.19	30.32	12.48
Yp2	2	Farmland	M.polymorpha	52	148.53	32.7	120.5	5.51	19	3.5	6.66	31.77	36.56	23.32	25.32
Yp3	2	Natural ecosystem	M.polymorpha	11.33	79.7	34.01	119.19	5.51	10	3.2	5.3	21.5	13.2	21.32	32.1
Ky5	2	Natural ecosystem	M.luplina	27.23	93.38	5.72	184.11	7.11667	49.08	33.83	38.44	37.65	32.26	40.43	15.84
